# Supplementary material
Source: ML conference proceedings conference paper supplement (https://openaccess.thecvf.com/content/CVPR_2019/html/Branchaud-Charron_Spectral_Metric_for_CVPR_2019_paper.html)
Supplement: Supplementary file 1 [file Branchaud-Charron_Spectral_Metric_for_CVPR_2019_supplemental.pdf]

# Supplementary Material

## Spectral Metric for Dataset Complexity Assessment

### 1. Instance selection

In the results section, we showed that STL-10 was a bit harder than CIFAR10 with 500 samples per class even though these datasets are visually very similar. To further our point, we show in Fig. 1 the MDS representation of both datasets. While the *car-truck* distance is smaller in CIFAR10, the six animal classes in STL-10 are overall closer together and thus a slightly more difficult to disentangle.

### 2. Comparison with other graph-based methods

We mentioned in the *Previous works* section that other graph-based methods have been proposed in the past. One could wonder how our measure differs from those. The main advantage of our approach compared to other graph-based methods is the fact that our graph embeds classes and not samples, thanks to the spectral clustering formalism. This leads to a  $K \times K$  Laplacian matrix which is order of magnitude smaller than the  $N \times N$  similarity matrix often required by other methods. This brings a huge advantage both memory and processing wise while allowing our method to naturally expand to the number of classes.

### 3. How to choose the auto-encoder architecture?

Empirical evidences show that any auto-encoder that properly reconstruct images can be used with our method. The key element for our method is to have low-dimensional space which correctly regroup images with similar content.

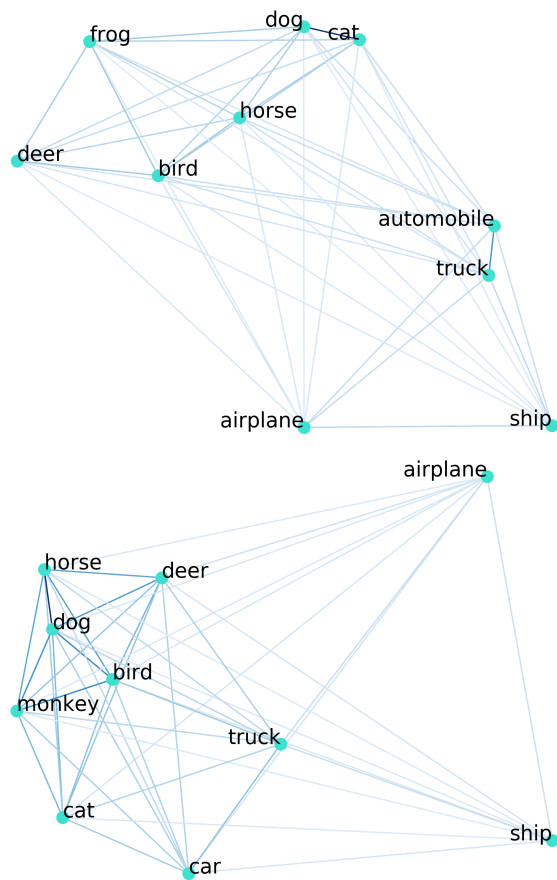

Figure 1: Comparison between the [Top] 2D plot of CIFAR10 with 500 samples per class and [Bottom] 2D plot of STL-10. As we see, the nodes in STL-10 seems closer than in CIFAR10.

| $CNN_{AE}$ | CSG   | F1    | F2       | F3    | F4    | N1    | N2    | N3    | N4    | T1    | T2      | AlexNet Acc. | Resnet Acc. |
|------------|-------|-------|----------|-------|-------|-------|-------|-------|-------|-------|---------|--------------|-------------|
| compcars   | 6.421 | 0.025 | 2.10E-15 | 0.031 | 3.582 | 0.796 | 1.018 | 0.668 | 0.176 | 1     | 23.27   | 0.303        | 0.122       |
| stl10      | 5.051 | 0.243 | 2.56E-15 | 0.056 | 4.915 | 0.869 | 1.075 | 0.78  | 0.609 | 1     | 19.531  | 0.314        | 0.367       |
| cifar10    | 3.509 | 0.331 | 1.37E-14 | 0.022 | 0.87  | 0.712 | 1.002 | 0.618 | 0.468 | 1     | 195.312 | 0.821        | 0.807       |
| svhn       | 3.986 | 0.008 | 1.28E-14 | 0.01  | 0.406 | 0.637 | 0.989 | 0.525 | 0.646 | 1     | 286.16  | 0.918        | 0.933       |
| notMNIST   | 0.564 | 0.756 | 1.30E-11 | 0.133 | 6.915 | 0.226 | 0.599 | 0.155 | 0.042 | 1     | 73.141  | 0.951        | 0.96        |
| mnist      | 0.202 | 0.723 | 2.44E-19 | 0.258 | 2.803 | 0.078 | 0.7   | 0.039 | 0.021 | 0.998 | 234.375 | 0.994        | 0.954       |

Table 1: Complexity estimation for all 10 class datasets for all methods using  $CNN_{AE}$  embedding.

| CNN-TSNE | CSG   | F1    | F2     | F3    | F4    | N1    | N2    | N3    | N4    | T1    | T2        | AlexNet Acc. | Resnet Acc. |
|----------|-------|-------|--------|-------|-------|-------|-------|-------|-------|-------|-----------|--------------|-------------|
| compcars | 2.928 | 0.014 | 35.578 | 0.031 | 0.084 | 0.845 | 1.633 | 0.632 | 0.874 | 0.993 | 1985.667  | 0.303        | 0.122       |
| stl10    | 3.072 | 0.222 | 37.264 | 0.031 | 0.073 | 0.91  | 2.426 | 0.788 | 0.831 | 0.999 | 1666.667  | 0.314        | 0.367       |
| cifar10  | 1.004 | 0.291 | 36.344 | 0.009 | 0.017 | 0.797 | 1.585 | 0.622 | 0.819 | 0.998 | 16666.666 | 0.821        | 0.807       |
| svhn     | 1.154 | 0.001 | 42.921 | 0.002 | 0.004 | 0.748 | 1.408 | 0.546 | 0.89  | 0.999 | 24419     | 0.918        | 0.933       |
| notMNIST | 0.725 | 1.752 | 33.723 | 0.083 | 0.212 | 0.234 | 0.284 | 0.158 | 0.434 | 0.999 | 6241.333  | 0.951        | 0.96        |
| mnist    | 0.112 | 6.193 | 26.706 | 0.229 | 0.522 | 0.055 | 0.112 | 0.03  | 0.104 | 0.982 | 20000     | 0.994        | 0.954       |

Table 2: Complexity estimation for all 10 class datasets for all methods using  $CNN_{AE}$  t-SNE embedding.

| t-SNE    | CSG   | F1    | F2     | F3    | F4    | N1    | N2    | N3    | N4    | T1    | T2      | AlexNet Acc. | Resnet Acc. |
|----------|-------|-------|--------|-------|-------|-------|-------|-------|-------|-------|---------|--------------|-------------|
| compcars | 2.079 | 0.018 | 30.066 | 0.03  | 0.092 | 0.857 | 1.518 | 0.675 | 0.867 | 0.99  | 1191.4  | 0.303        | 0.122       |
| stl10    | 1.761 | 0.822 | 20.818 | 0.199 | 0.415 | 0.843 | 1.512 | 0.704 | 0.756 | 0.999 | 1000    | 0.314        | 0.367       |
| cifar10  | 0.858 | 0.294 | 32.037 | 0.012 | 0.032 | 0.805 | 1.504 | 0.643 | 0.816 | 0.996 | 10000   | 0.821        | 0.807       |
| svhn     | 0.967 | 0.007 | 38.829 | 0.009 | 0.02  | 0.712 | 1.265 | 0.518 | 0.88  | 1     | 14651.4 | 0.918        | 0.933       |
| notMNIST | 0.709 | 1.847 | 24.405 | 0.197 | 0.513 | 0.193 | 0.288 | 0.136 | 0.356 | 0.999 | 3744.8  | 0.951        | 0.96        |
| mnist    | 0.151 | 4.721 | 16.875 | 0.393 | 1.112 | 0.051 | 0.105 | 0.029 | 0.083 | 0.998 | 12000   | 0.994        | 0.954       |

Table 3: Complexity estimation for all 10 class datasets for all methods using t-SNE embedding.

| Raw      | CSG   | F1    | F2       | F3    | F4    | N1    | N2    | N3    | N4    | T1   | T2     | AlexNet Acc. | Resnet Acc. |
|----------|-------|-------|----------|-------|-------|-------|-------|-------|-------|------|--------|--------------|-------------|
| compcars | 6.700 | 0.031 | 2.10E-43 | 0.053 | 5.962 | 0.81  | 1.024 | 0.713 | 0.172 | 0.99 | 0.121  | 0.618        | 0.52        |
| stl10    | 3.349 | 0.324 | 7.81E-06 | 0.243 | 16.97 | 0.795 | 1.037 | 0.732 | 0.418 | 0.99 | 0.181  | 0.994        | 0.954       |
| cifar10  | 3.579 | 0.244 | 3.54E+01 | 0.008 | 0.975 | 0.742 | 1.012 | 0.649 | 0.602 | 0.99 | 16.276 | 0.951        | 0.96        |
| svhn     | 3.889 | 0.005 | 2.45E-06 | 0.004 | 3     | 0.626 | 0.987 | 0.511 | 0.667 | 0.99 | 23.847 | 0.897        | 0.896       |
| notMNIST | 0.512 | 0.996 | 4.50E+01 | 0     | 0     | 0.198 | 0.577 | 0.137 | 0.038 | 1    | 7.961  | 0.918        | 0.933       |
| mnist    | 0.084 | 0.735 | 0.00E+00 | 0.243 | 5.203 | 0.054 | 0.7   | 0.026 | 0.007 | 0.99 | 76.531 | 0.314        | 0.367       |

Table 4: Complexity estimation for all 10 class datasets for all methods using no embedding.

| Method     | Alexnet |            |       |                     | ResNet |            |       |                     | XceptionNet |            |       |                     |
|------------|---------|------------|-------|---------------------|--------|------------|-------|---------------------|-------------|------------|-------|---------------------|
|            | Raw     | $CNN_{AE}$ | t-SNE | $CNN_{AE}$<br>t-SNE | Raw    | $CNN_{AE}$ | t-SNE | $CNN_{AE}$<br>t-SNE | Raw         | $CNN_{AE}$ | t-SNE | $CNN_{AE}$<br>t-SNE |
| N4         | 0.141   | 0.558      | 0.763 | 0.780               | 0.021  | 0.407      | 0.746 | 0.745               | 0.067       | 0.558      | 0.763 | 0.780               |
| F3         | 0.290   | 0.665      | 0.459 | 0.604               | 0.201  | 0.637      | 0.500 | 0.552               | 0.267       | 0.665      | 0.459 | 0.604               |
| F1         | 0.483   | 0.895      | 0.667 | 0.673               | 0.519  | 0.922      | 0.648 | 0.626               | 0.458       | 0.895      | 0.669 | 0.673               |
| F2         | 0.366   | 0.449      | 0.234 | 0.660               | 0.432  | 0.470      | 0.320 | 0.576               | 0.465       | 0.449      | 0.234 | 0.660               |
| T1         | 0.642   | 0.519      | 0.505 | 0.332               | 0.642  | 0.461      | 0.677 | 0.214               | 0.642       | 0.519      | 0.505 | 0.332               |
| T2         | 0.655   | 0.783      | 0.783 | 0.783               | 0.578  | 0.737      | 0.737 | 0.737               | 0.578       | 0.783      | 0.783 | 0.783               |
| N2         | 0.677   | 0.812      | 0.794 | 0.854               | 0.619  | 0.775      | 0.761 | 0.760               | 0.564       | 0.816      | 0.794 | 0.854               |
| F4         | 0.760   | 0.067      | 0.531 | 0.606               | 0.606  | 0.001      | 0.542 | 0.551               | 0.676       | 0.067      | 0.531 | 0.606               |
| N1         | 0.767   | 0.861      | 0.817 | 0.833               | 0.700  | 0.809      | 0.784 | 0.783               | 0.651       | 0.861      | 0.817 | 0.833               |
| N3         | 0.803   | 0.855      | 0.823 | 0.837               | 0.727  | 0.794      | 0.781 | 0.765               | 0.681       | 0.855      | 0.823 | 0.837               |
| Our Method | 0.696   | 0.823      | 0.903 | <b>0.968</b>        | 0.712  | 0.838      | 0.932 | <b>0.935</b>        | 0.718       | 0.804      | 0.931 | <b>0.951</b>        |

Table 5: Correlation values between the accuracy of AlexNet, ResNet and XceptionNet and Ho & Basu c-measures with four different embeddings. These results complement Table 3, 4 and 5 in the original paper.
